# Supplementary material for: Centrosome maturation requires YB-1 to regulate dynamic instability of microtubules for nucleus reassembly
Source: PubMed Central journal article supplement (PMC4350100; doi:10.1038/srep08768), 2015-03-05
Supplement: srep08768-s5.pdf [file srep08768-s5.pdf]

**Title:** Centrosome maturation requires YB-1 to regulate dynamic instability of microtubules for nucleus reassembly

**Authors:** Atsushi Kawaguchi<sup>1\*</sup>, Masamitsu N. Asaka<sup>1</sup>, Ken Matsumoto<sup>2</sup>, and Kyosuke Nagata<sup>1</sup>

**Addresses:**

<sup>1</sup>Department of Infection Biology, Faculty of Medicine, University of Tsukuba, 1-1-1 Tennodai, Tsukuba 305-8575, Japan

<sup>2</sup>Chemical Genetics Laboratory, RIKEN, 2-1 Hirosawa, Wako, Saitama 351-0198, Japan

\*Correspondence should be addressed to A. K. (e-mail: ats-kawaguchi@md.tsukuba.ac.jp)

## **Supplemental Legends**

### **Supplementary Movie 1 Live-cell imaging of EB1-GFP in control cells, related to Figure 1C.**

At 48 h post transfection of non-targeting siRNA, HeLa-EB1-GFP cells were subjected to live-cell imaging of EB1-GFP nucleated from the centrosome at metaphase. The images were acquired at 1.56-sec intervals for 1 min.

### **Supplementary Movie 2 Live-cell imaging of EB1-GFP in YB-1 KD cells, related to Figure 1C.**

At 48 h post transfection of YB-1 siRNA, HeLa-EB1-GFP cells were subjected to live-cell imaging of EB1-GFP nucleated from the centrosome at metaphase. The images were acquired at 1.56-sec intervals for 1 min.

### **Supplementary Movie 3 Live-cell imaging of GFP-emerin in control cells, related to Figure 3A.**

At 48 h post transfection of non-targeting siRNA, HeLa-GFP-emerin cells were subjected to live-cell imaging at telophase. A major portion of GFP-emerin was rapidly recruited to the segregated chromosomes and then evenly distributed around the chromosomes. Images were acquired at 2-min intervals for 90 min.

### **Supplementary Movie 4 Live-cell imaging of GFP-emerin in YB-1 KD cells, related to Figure 3A.**

At 48 h post transfection of YB-1 siRNA, HeLa-GFP-emerin cells were subjected to live-cell imaging at telophase. A part of GFP-emerin sporadically formed spore-like structures in the peripheral cytoplasm. Images were acquired at 2-min intervals for 90 min.

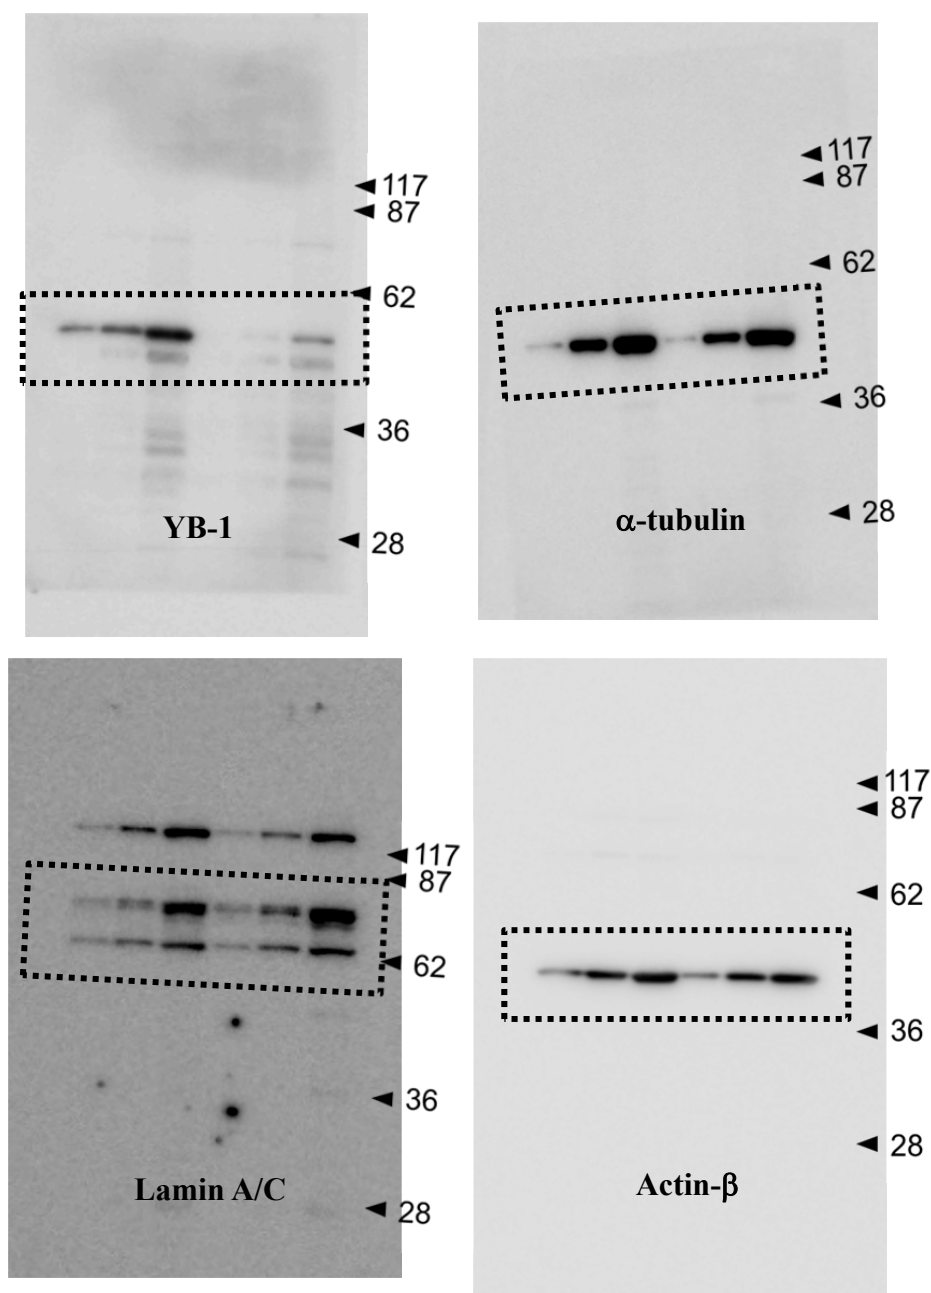

**Supplementary Figure 1 Original full-length blots before cropping.**

The original blots for Figure 1B. HeLa cells were transfected with either non-targeting (control; lanes 1-3) or YB-1 siRNA (siYB-1; lanes 4-6). After 48 h post transfection, the cells were lysed, and the lysates ( $5 \times 10^3$ ,  $1 \times 10^4$ , and  $2 \times 10^4$  cells) were analyzed by SDS-PAGE followed by western blotting assays with anti-YB-1, anti- $\alpha$ -tubulin, anti-lamin A/C, and anti-actin- $\beta$  antibodies.
